# Supplementary material for: Electrically conductive nanocomposite hydrogels embedded with functionalized carbon nanotubes for spinal cord injury
Source: Royal Society of Chemistry journal article supplement (doi:10.1039/c8nj03038c), 2018-01-01
Supplement: c8nj03038c1.pdf [file c8nj03038c1.pdf]

## Supporting Information

### Electrical conductive nanocomposite hydrogel embedded with functionalized carbon nanotubes for spinal cord injury

Xifeng Liu<sup>1,2</sup>, Joseph C. Kim<sup>1</sup>, A. Lee Miller II<sup>2</sup>, Brian E. Waletzki<sup>2</sup>, Lichun Lu<sup>\*1,2</sup>

<sup>1</sup>Department of Physiology and Biomedical Engineering, Mayo Clinic, Rochester, MN 55905, USA. \*Corresponding Author. Email address: [Lu.Lichun@mayo.edu](mailto:Lu.Lichun@mayo.edu)

<sup>2</sup>Department of Orthopedic Surgery, Mayo Clinic, Rochester, MN 55905, USA.

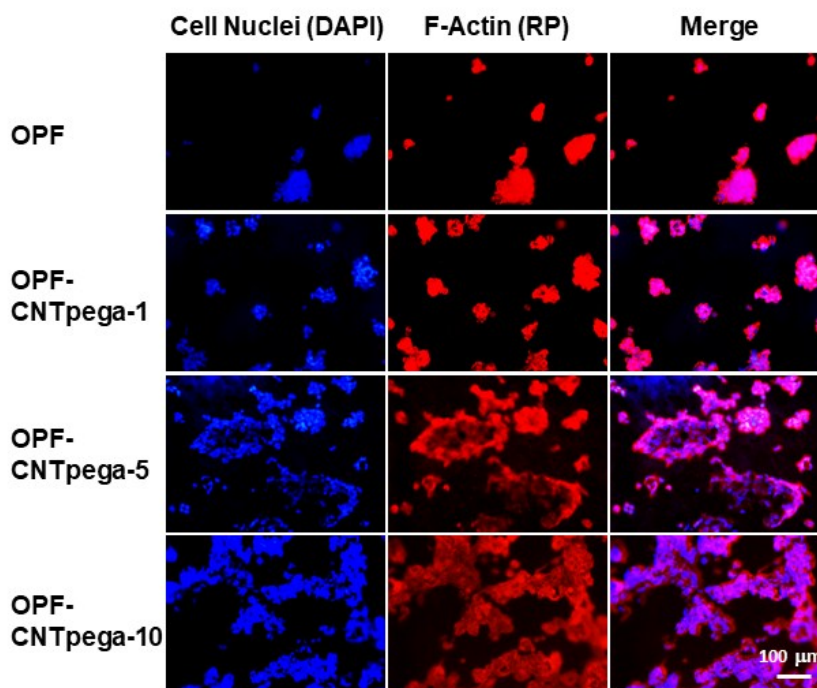

**Figure S1.** Fluorescent images of PC12 cells cultured for 4 days on four types of OPF based hydrogels.

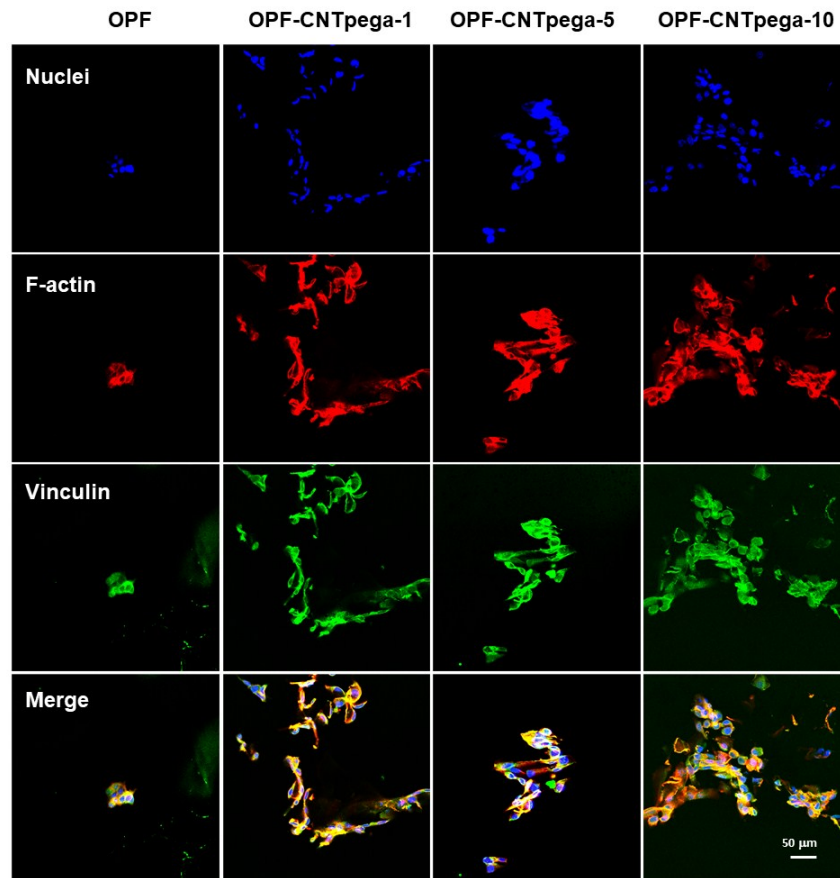

**Figure S2.** Confocal imaging of PC12 cells after nerve growth factor (NGF) induced differentiation for 4 days on four types of OPF based hydrogels.
